# Supplementary material for: Effects of resisted sprint training on agility and change-of-direction performance in soccer players: a systematic review with meta-analysis
Source: PeerJ. 2025 Oct 23;13:e20084. doi: 10.7717/peerj.20084 (PMC12554313; doi:10.7717/peerj.20084)
Supplement: Supplemental Information 2 [file peerj-13-20084-s002.xlsx]

## Sheet: 统计数据
Study	Study ID	Mean1	SD1	N1	Mean2	SD2	N2
Study 1	Carlos-Vivas et al., 2020	-0.24	0.23	13	-0.16	0.27	12
		-0.38	0.23	11	-0.16	0.27	12
		-0.33	0.21	12	-0.16	0.27	12
Study 2	de Hoyo et al., 2016	0.02	0.17	12	-0.02	0.12	11
		0.02	0.17	12	0	0.19	9
Study 3	McMorrow et al., 2019	-0.232	0.24	6	-0.248	0.17	7
Study 4	Sal-de-Rellan et al., 2024	-0.37	0.41	18	-0.202	0.49	12
		-0.358	0.33	18	-0.117	0.32	12
		-0.12	0.37	18	-0.085	0.29	12
		-0.321	0.57	18	-0.101	0.6	12
		-0.516	0.62	18	-0.247	0.69	12
		-0.898	0.95	18	-0.433	0.79	12
		-0.351	0.41	18	0.207	0.46	12
Study 5	Grazioli et al., 2023	-0.32	0.34	10	-0.02	0.19	11
Study 6	Shalfawi et al., 2013	-0.17	0.28	10	0.03	0.35	10
Study 7	Gil et al., 2018	-0.36	0.2	9	-0.35	0.17	9
Study 8	Otero-Esquina et al., 2017	-0.15	0.19	12	-0.17	0.2	12
		-0.34	0.37	12	-0.17	0.2	12
Study 9	Pareja-Blanco et al., 2021	-0.05	0.19	14	-0.06	0.19	11
		-0.07	0.18	15	-0.06	0.19	11
		-0.05	0.19	14	-0.05	0.17	15
		-0.07	0.18	15	-0.05	0.17	15
Study 10	Rodriguez-Osorio et al., 2019	0.02	0.23	16	0.05	0.26	19
		-0.06	0.25	19	0.05	0.26	19
		0	0.34	16	-0.02	0.33	19
		-0.11	0.24	19	-0.02	0.33	19
Study 11	Loturco et al., 2017	-0.15	0.17	7	-0.19	0.23	11
Study 12	Raya-González et al., 2017	-0.05	0.1	8	0.05	0.12	8
		-0.05	0.12	8	0.07	0.1	8
Study 13	Simpson JD et al., 2019	-0.24	0.44	9	-0.11	0.91	10
Trail Registry: The study has been registered in the International Prospective Register of Systematic Reviews (PROSPERO: CRD42024608859).
