# Supplementary material for: Effects of resisted sprint training on agility and change-of-direction performance in soccer players: a systematic review with meta-analysis
Source: PeerJ. 2025 Oct 23;13:e20084. doi: 10.7717/peerj.20084 (PMC12554313; doi:10.7717/peerj.20084)
Supplement: Supplemental Information 3 [file peerj-13-20084-s003.xlsx]

## Sheet: Sheet1
Study ID	match	test	Mean1	SD1	N1	Mean2	SD2	N2	Age (years)	Gender	Competitive level	training type	load modality	loading method	frequency	length	Total volume	Session duration (min)	comparators	outcomes
Carlos-Vivas et al., 2020	HRS vs, URS	Zig-zag 20-m test	-0.24	0.23	13	-0.16	0.27	12	18.3	Male	Professional	Horizontal	1080 Sprint?	BM-based	2	8	6400	30	URT	COD
	VRS vs, URS		-0.38	0.23	11	-0.16	0.27	12			Professional	Vertical	weighted vest	BM-based					URT	COD
	CRS vs, URS		-0.33	0.21	12	-0.16	0.27	12			Professional	Combined	1080 Sprint?+weighted vest	BM-based					URT	COD
de Hoyo et al., 2016	HRS vs, RT	Zig-zag 20-m test	0.02	0.17	12	-0.02	0.12	11	18	Male	Elite	Horizontal	Sled	BM-based	1	8	2680	60	AT	COD
	HRS vs, URP		0.02	0.17	12	0	0.19	9			Elite	Horizontal	Sled	BM-based					AT	COD
McMorrow et al., 2019	HRS vs URS	S180° test	-0.232	0.24	6	-0.248	0.17	7	24.4	Male	Professional	Horizontal	Sled	BM-based	1	6	800	45	URT	Agility
Sal-de-Rellan et al., 2024	CRS vs FT	Arrowhead COD test-R	-0.37	0.41	18	-0.202	0.49	12	18.1	Male	Elite	Combined	Sled + weighted vest	BM-based	2	6	2520	15	AT	COD
		Arrowhead COD test-L	-0.358	0.33	18	-0.117	0.32	12			Elite	Combined		BM-based					AT	COD
		15m-AG-B	-0.12	0.37	18	-0.085	0.29	12			Elite	Combined		BM-based					AT	COD
		Zig-zag-B	-0.321	0.57	18	-0.101	0.6	12			Elite	Combined		BM-based					AT	COD
		T-test	-0.516	0.62	18	-0.247	0.69	12			Elite	Combined		BM-based					AT	Agility
		IAT	-0.898	0.95	18	-0.433	0.79	12			Elite	Combined		BM-based					AT	Agility
		NMAT	-0.351	0.41	18	0.207	0.46	12			Elite	Combined		BM-based					AT	Agility
Grazioli et al., 2023	HRS-M vs HRS-H	Zig-zag 20-m test	-0.32	0.34	10	-0.02	0.19	11	25.9	Male	Professional	Horizontal	Sled	VL-based	1	8	4765.2	15		COD
Shalfawi et al., 2013	HRAS vs RT	S180° agility test	-0.17	0.28	10	0.03	0.35	10	19.4	Female	Elite	Horizontal	Resistance band	Variable	2	10	1840	60	AT	Agility
Gil et al., 2018	HRS vs URS	Zig-zag 20-m test	-0.36	0.2	9	-0.35	0.17	9	22.4	Male	Professional	Horizontal	Elastic cords and sheaves	VL-based	2	6	800	60	URT	COD
Otero-Esquina et al., 2017	HRS1 vs CG	V-cut test	-0.15	0.19	12	-0.17	0.2	12	17	Male	Professional	Horizontal	Sled	BM-based	1	7	560	60-90	CG	Agility
	HRS2 vs CG	V-cut test	-0.34	0.37	12	-0.17	0.2	12	22.4		Professional	Horizontal	Sled	BM-based					CG	Agility
Pareja-Blanco et al., 2021	HRS-H vs CG	20-m sprint with a 180° COD test	-0.05	0.19	14	-0.06	0.19	11		Male	Amateur	Horizontal	Sled	BM-based	1	8	880	30-45	CG	COD
	HRS-L vs CG	20-m sprint with a 180° COD test	-0.07	0.18	15	-0.06	0.19	11			Amateur	Horizontal	Sled	BM-based					CG	COD
	HRS-H vs RT	20-m sprint with a 180° COD test	-0.05	0.19	14	-0.05	0.17	15			Amateur	Horizontal	Sled	BM-based					AT	COD
	HRS-L vs RT	20-m sprint with a 180° COD test	-0.07	0.18	15	-0.05	0.17	15			Amateur	Horizontal	Sled	BM-based					AT	COD
Rodriguez-Osorio et al., 2019	VRCOD-M vs URCOD	L-run test	0.02	0.23	16	0.05	0.26	19	18.2	Male	Professional	Vertical	Weighted vest	BM-based	2	6		20	URT	COD
	VRCOD-L vs URCOD	L-run test	-0.06	0.25	19	0.05	0.26	19			Professional	Vertical	Weighted vest	BM-based					URT	COD
	VRCOD-M vs URCOD	V-cut test	0	0.34	16	-0.02	0.33	19			Professional	Vertical	Weighted vest	BM-based					URT	Agility
	VRCOD-L vs URCOD	V-cut test	-0.11	0.24	19	-0.02	0.33	19			Professional	Vertical	Weighted vest	BM-based					URT	Agility
Loturco et al., 2017	HRS vs URP	Zig-zag 20-m test	-0.15	0.17	7	-0.19	0.23	11	21.9	Male	Professional	Horizontal	Sled	BM-based	3	5	1920	60	AT	COD
Raya-González et al., 2017	VRS vs, RT	COD-D	-0.05	0.1	8	0.05	0.12	8	16.6	Male	Elite	Vertical	Weighted vest	BM-based	2	6		Various	AT	COD
	VRS vs, RT	COD-I	-0.05	0.12	8	0.07	0.1	8			Elite	Vertical	Weighted vest	BM-based					AT	COD
Simpson JD et al., 2019	VRS vs CG	T-test	-0.24	0.44	9	-0.11	0.91	10	21	Female	Amateur	Vertical	Weighted vest	BM-based	3	6		NR	CG	Agility
Trail Registry: The study has been registered in the International Prospective Register of Systematic Reviews (PROSPERO: CRD42024608859).
